# Supplementary material for: Endoplasmic reticulum stress and IRE-1 signaling cause apoptosis in colon cancer cells in response to andrographolide treatment
Source: PubMed Central journal article supplement (PMC5173070; doi:10.18632/oncotarget.9180), 2016-05-05
Supplement: oncotarget-07-41432-s001.pdf [file oncotarget-07-41432-s001.pdf]

## SUPPLEMENTARY FIGURES AND TABLE

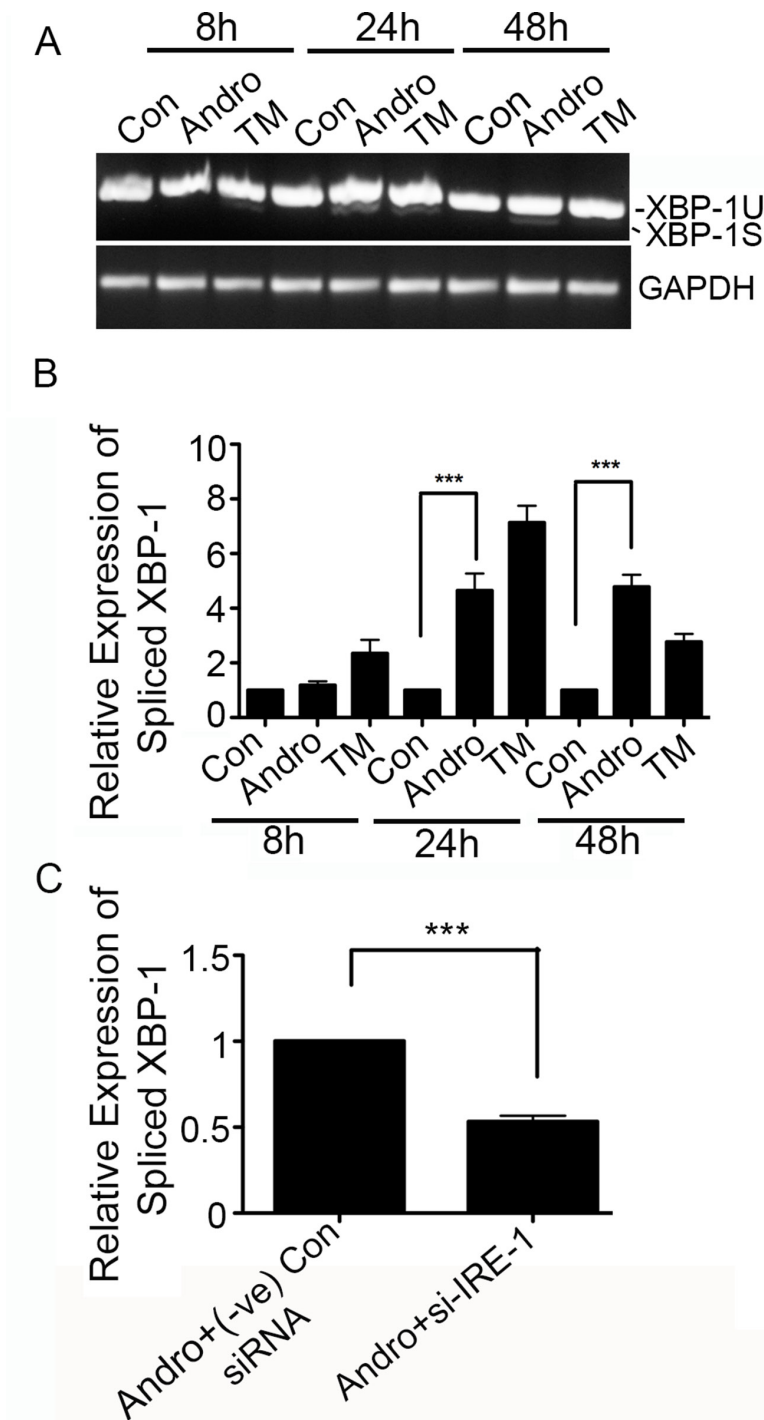

**Supplementary Figure S1: Andrographolide stimulates XBP-1 splicing in T84 cells.** **A.** T84 cells were treated with of andrographolide (45  $\mu$ M) or TM (2  $\mu$ g/ml) for the indicated time and RT-PCR was used to detect the presence spliced XBP-1 mRNA. The RT-PCR products were analyzed by 3.0% agarose gel electrophoresis. GAPDH was used as the internal control. **B.** T84 cells were treated with of andrographolide (45  $\mu$ M) or TM (2  $\mu$ g/ml) for the indicated time and the spliced form of XBP1 mRNA was analyzed by semi-quantitative RT-PCR. **C.** T84 cells were transfected with IRE-1 siRNA or control siRNA prior to treatment with andrographolide (45  $\mu$ M) for 48 h and the spliced form of XBP1 mRNA was analyzed by semi-quantitative RT-PCR. (\*\*\*) $P < 0.001$

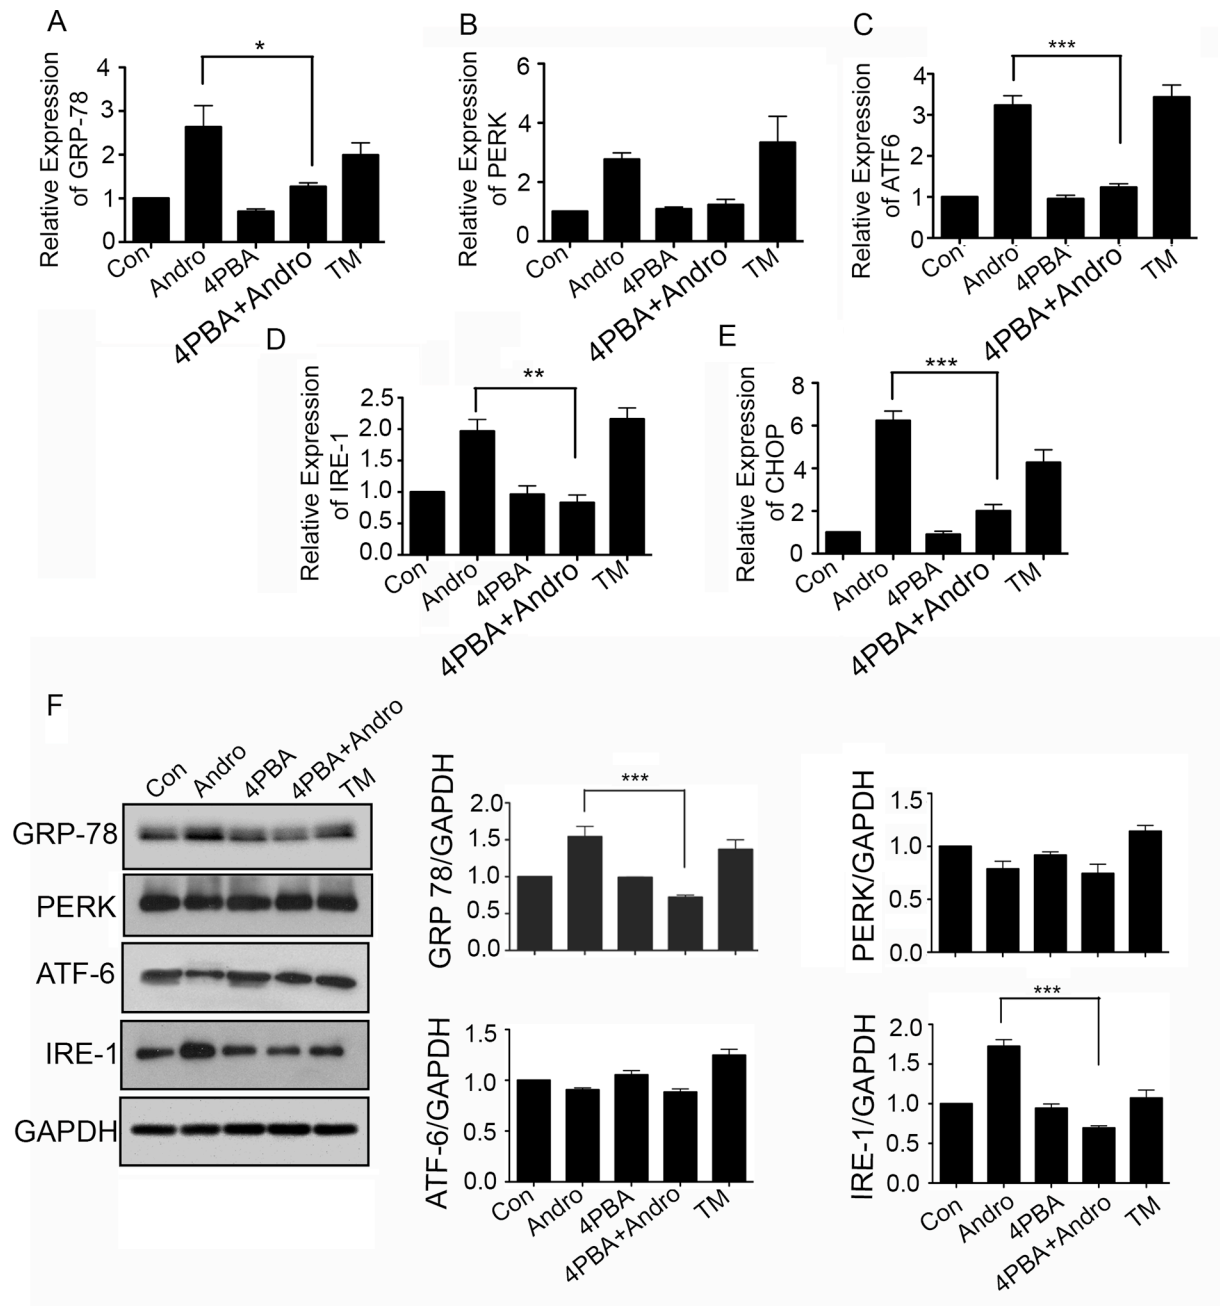

**Supplementary Figure S2: Andrographolide induces ER stress-related proteins in HCT 116 colon cancer cells.** HCT-116 cells were treated with andrographolide at  $IC_{50}$  (60  $\mu$ M) for 24 h in the presence or absence of 4-PBA and TM. Transcriptional levels of expression for ER stress associated genes was monitored by qRT-PCR for **A**. GRP-78, **B**. PERK, **C**. ATF-6, **D**. IRE-1, or **E**. CHOP. Bar graphs show quantitative results normalized to GAPDH mRNA levels. Results are from three independent experiments. Statistical significance was determined using one way-ANOVA followed by Bonferroni test ( $P < 0.05$ ,  $^{**}P < 0.01$ ,  $^{***}P < 0.001$ ). **F**. HCT-116 cell lysates were prepared with above mentioned conditions and protein expression was determined by immunoblot for GRP-78, PERK, ATF-6, IRE-1, and GAPDH. Densitometry analysis was performed and normalized with GAPDH.

Supplementary Table S1: qRT-PCR primers

| Gene   | Primer sequence forward        | Primer sequence reverse      |
|--------|--------------------------------|------------------------------|
| GAPDH  | 5'-CGACCACTTTGTCAAGCTCA-3'     | 5'-AGGGGAGATTCAGTGTGGTG-3'   |
| GRP-78 | 5'-GGTGAAAGACCCCTGACAAA-3'     | 5'-GTCAGGCGATTCTGGTCATT-3'   |
| ATF6   | 5'-TCAGGGAGTGAGCTACAAGT-3'     | 5'-CTTGTGGTCTTGTATGGGT-3'    |
| CHOP   | 5'-TTCTCTGGCTTGGCTGACTG-3'     | 5'-CTGCGTATGTGGGATTGAGG-3'   |
| IRE-1  | 5'-GGGAAATACTCTACCAGCCT-3'     | 5'-GAAATCTCTCCAGCATCTTG-3'   |
| PERK   | 5'-ATCCCCCATGGAACGACCTG-3'     | 5'-ACCCGCCAGGGACAAAATG-3'    |
| XBP1   | 5'-AACCAGGAGTTAAGACAGCGCTT-3'  | 5'-CTGCACCCTCTGCGGACT-3'     |
| XBP1s  | 5'-GTTGAGAACCAGGAGTTAAGACAG-3' | 5'-CAGAGGGTATCTCAAGACTAGG-3' |
| Bax    | 5'-GAGAGGTCTTTTCCGAGTGG-3'     | 5'-CCTTGAGCACCAGTTTGCTG-3'   |
| Bcl-2  | 5'-GGAGGCTGGGATGCCTTT3'        | 5'-ACCCATGGCGGTGACCATGC-3'   |
